# Supplementary material
Source: publisher figshare collection journal article supplement (https://frontiersin.figshare.com/ndownloader/files/31085788)
Supplement: Supplementary file [file 31085788]

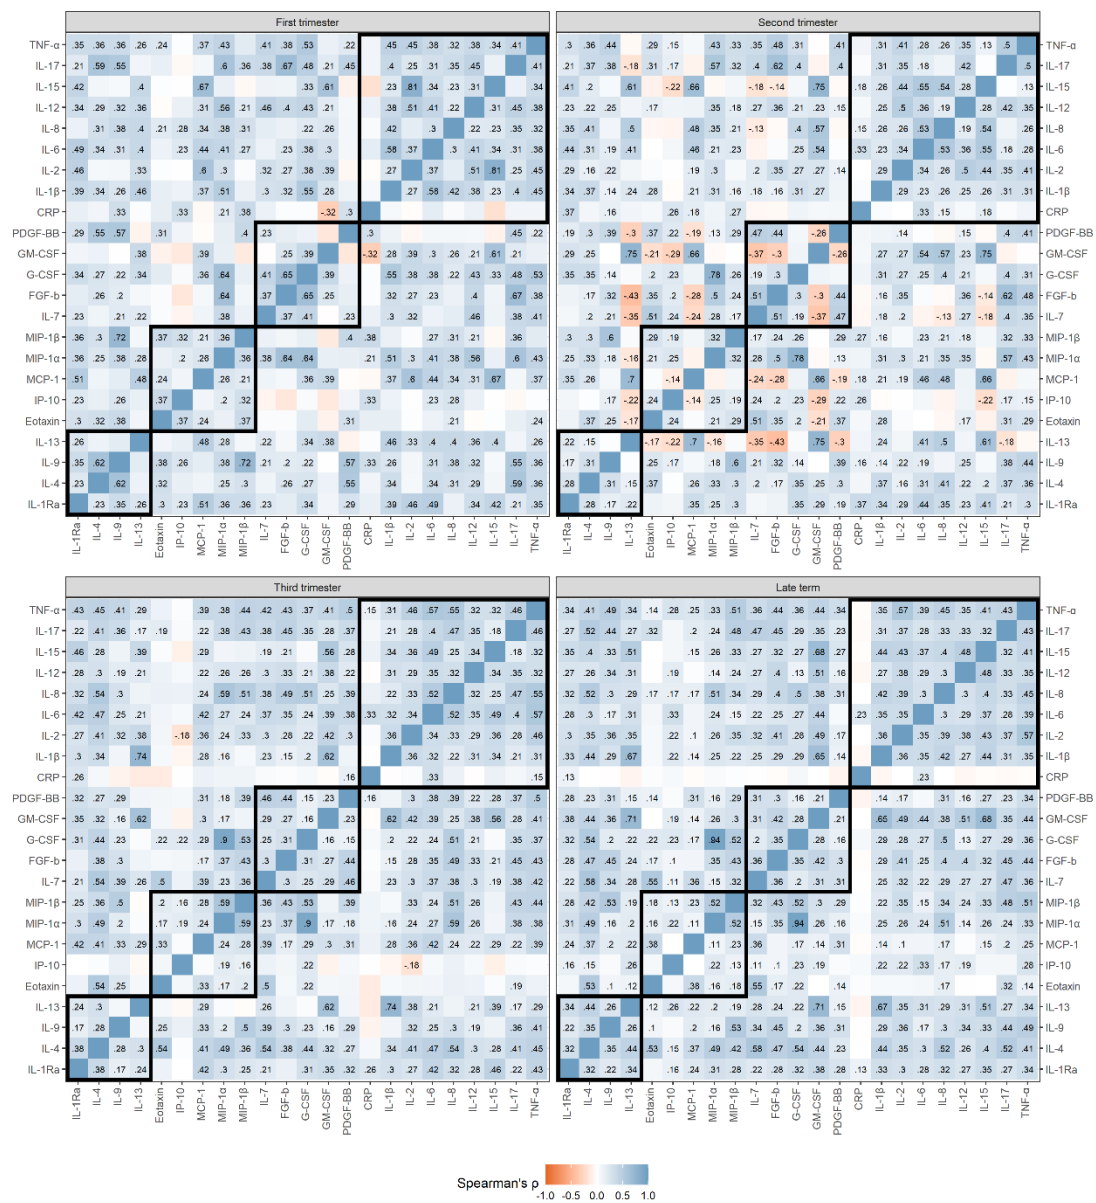

**Supplementary Figure 4. Within-trimester correlations for serum cytokine levels.** Spearman's correlation coefficient was calculated pairwise between cytokines within each trimester as indicated. Correlation is stated as number when statistically significant ( $P < 0.05$ ). The cytokines are sorted by functional group and the frames enclose within-group correlations.
